# Supplementary material for: Multifunctional MXene-doped photothermal microneedles for drug-resistant bacteria-infected wound healing
Source: Royal Society of Chemistry journal article supplement (doi:10.1039/d3bm01676e), 2023-12-08
Supplement: d3bm01676e1.pdf [file d3bm01676e1.pdf]

## Supplementary information

### **Multifunctional MXene-doped photothermal microneedle for drug-resistant bacteria-infected wound healing**

*Yongjin Zhong<sup>a</sup>, Yancheng Lai<sup>a</sup>, Zeru Feng<sup>a</sup>, Si Huang<sup>a</sup>, Yu Fu<sup>b</sup>, Lirong Huang<sup>a</sup>, Kengfu Lan<sup>a</sup>, Anchun Mo<sup>\*a</sup>*

<sup>a</sup>State Key Laboratory of Oral Diseases & National Center for Stomatology & National Clinical Research Center for Oral Diseases & Department of Implantology, West China Hospital of Stomatology, Sichuan University, Chengdu 610041, Sichuan, China

<sup>b</sup>Department of Stomatology, Sichuan Academy of Medical Sciences & Sichuan Provincial People's Hospital, School of Medicine, University of Electronic Science and Technology of China, Chengdu, China

\*Corresponding author:

Dr. Anchun Mo, State Key Laboratory of Oral Diseases & National Center for Stomatology & National Clinical Research Center for Oral Diseases & Department of Implantology, West China Hospital of Stomatology, Sichuan University, Chengdu 610041, Sichuan, China. E-mail: moanchun@163.com

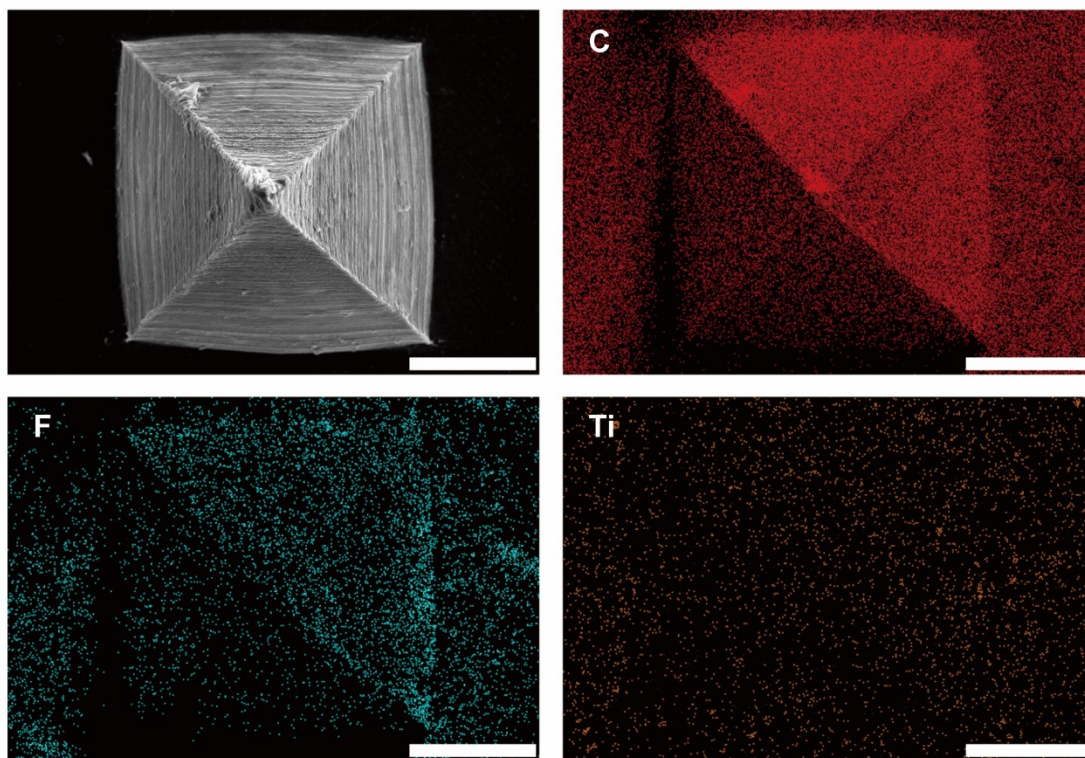

**Figure S1.** Elemental mapping images of 2MHMN. Scar bar: 100  $\mu\text{m}$ .

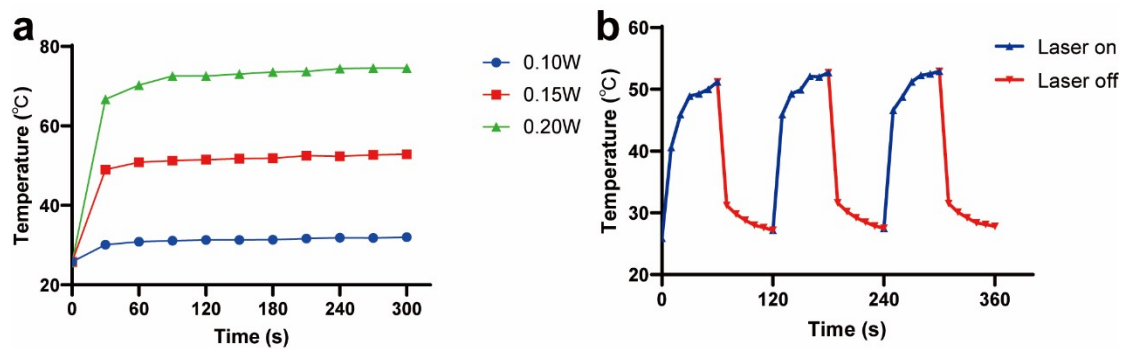

**Figure S2.** (a) Temperature changes of the 2MHMN under irradiation of a laser at different power (0.1, 0.15 and 0.2W). (b) Photothermal heating/cooling curves of 2MHMN after three cycles of 808 nm laser irradiation (0.15W).

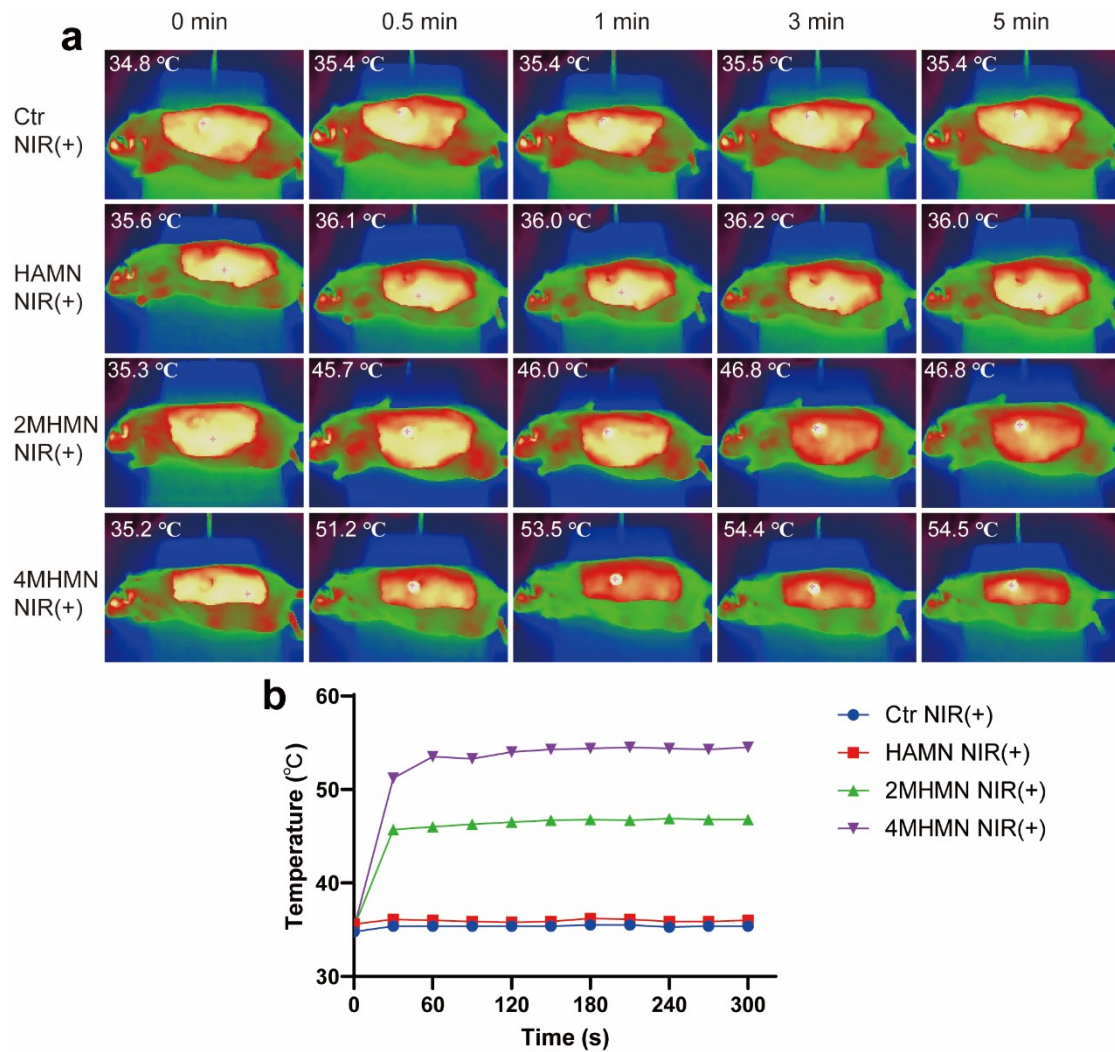

**Figure S3.** (a) *In vivo* thermal image of Ctrl, HAMN, 2MHMN and 4MMN patches under the irradiation of 808nm laser (0.15W). (b) Temperature increase curves of Ctrl, HAMN, 2MHMN and 4MHMN under irradiation at 808nm (0.15W).

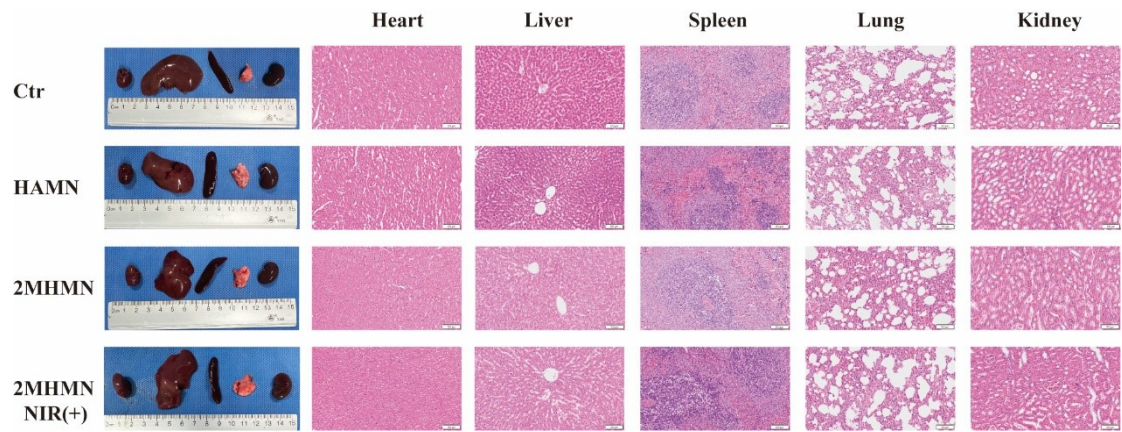

**Figure S4.** Digital photographs and representative H&E-stained sections of major organs (heart, liver, spleen, kidney, and lung) from mice after various treatments. Scar bar: 100  $\mu\text{m}$ .
